# Supplementary material for: Serum albumin and albuminuria predict the progression of chronic kidney disease in patients with newly diagnosed type 2 diabetes: a retrospective study
Source: PeerJ. 2021 Jul 6;9:e11735. doi: 10.7717/peerj.11735 (PMC8269640; doi:10.7717/peerj.11735)
Supplement: Supplemental Information 1 [file peerj-09-11735-s001.xlsx]

## Sheet: raw data 
ID	SEX	Age	Height	Weight	BMI	Waistline	Hipline	Systolic pressure	Diastolic pressure	Heart rate	Smoking	Drinking	Hypertension	Coronary heart disease	eGFR	HB	TSH	FT3	FT4	Total protein	Albumin	Glutamine	ALP	LD	CK	Direct bilirubin	Indirect bilirubin	Total bile acids	Uric acid	Glucose	Microalbuminuria	quartiles	Total cholesterol	Triglyceride	HDL	LDL	HbA1c	Creatine	Cr-2 years later	kidney function decline	diabetic retinopathy	RAAS blockade
1018451	2	49	165	62	22.7732	78	95	160	95	72	0	0	1	1	71.3623	118	1.634	3.45	12.9	58.3	30.4	19	64	206	101	1.3	2.8	1.9	220	12.61	720	4	8.34	2.12	1.53	6.16	9.9	83	165	1	1	1
1046215	1	74	168	89	31.5334	100	110	180	100	70	0	0	1	0	38.3547	134	3.287	3.99	14.62	69.5	39.4	29	63	248	165	2.6	5.8	5	592	5.87	300	4	5.35	2.68	1.01	3.26	12.5	152	182	0	0	1
1010410	2	76	158	75.5	30.2436	98	107	180	90	76	0	0	1	0	44.7366	126	0.08	6.26	22.95	66.3	37	21	100	215	61	2.9	8.4	16.3	397	16.74	319.2	4	4.45	1.8	1.11	1.7	10	102	108.2	0	0	1
1016890	2	59	160	57	22.2656	85	90	180	100	76	0	0	1	0	65.5651	125	1.418	3.51	18.3	70.2	42.3	38	113	180	59	3.6	6.9	3.7	394	31.08	84.5	2	6.2	8.23	1.33	2.28	13.2	84	133.8	1	0	1
1019815	1	64	168	75	26.5731	88	90	180	100	80	0	1	1	1	94.9358	147	0.955	4.62	16.07	69.6	41.2	57	49	195	193	6	17.2	11.8	686	23.8	93.84	2	4.88	3.31	1.18	2.64	7.8	71	74.5	0	1	1
1041808	1	57	170	78	26.9896	93	98	170	100	72	1	0	1	0	109.98	141	0.464	3.58	14.97	61.4	35.8	37	83	226	607	2.4	8.1	3.6	268	14.66	750	4	5.75	1.3	1.33	3.13	7.3	55	77.6	1	1	1
1041752	2	57	155	65	27.0552	86	90	165	70	72	0	0	1	0	104.571	126	3.095	3.68	15.04	72.9	42.4	16	66	147	31	2.8	10.6	7.8	208	10.8	75.45	2	5.35	3.5	1.04	3.07	7.6	48	42.7	0	1	1
1022886	1	65	148	45	20.5442	83	90	160	80	60	1	0	0	0	66.973	130	1.723	3.12	17.52	64	35.4	20	65	197	78	3.3	3.8	8.5	236.5	19.9	121.6	3	6.07	1.05	1.27	3.55	10.1	101	236.5	1	1	1
1052850	2	63	158	100	40.0577	110	113	160	100	70	0	0	1	0	49.2414	108	3.675	4.19	15.41	66.2	37.8	36	94	240	82	3.8	13	10.9	306	12.27	1500	4	5	2.12	1.37	2.8	7.9	104	183.6	1	0	1
1044547	2	47	162	64.5	24.577	98	99	160	95	74	0	0	1	0	103.675	129	1.137	4.62	15.46	72.5	42.7	32	60	161	96	2	6	6.6	410	12.53	7.28	1	4.52	1.94	1.41	2.44	6.6	61	72.6	0	0	0
1026529	1	44	170	87	30.1038	110	106	160	120	76	0	1	1	0	64.976	157	2.759	5.16	19.02	73.4	44	128	60	195	111	4.8	10.2	7.6	192	15.47	49.2	2	5.72	4.8	1.6	3.14	8	117	91.7	0	0	1
1036630	1	50	168	71	25.1559	94	96	160	100	76	0	0	1	0	86.7107	119	1.042	5.21	16.79	70.7	41	35	59	164	158	2.2	3.3	5.8	393	10.72	985	4	4.3	3.84	0.79	2.5	9.6	89	120.4	1	1	1
1009513	2	59	160	64	25	80	87	160	90	76	0	0	1	0	95.2939	129	1.485	4.09	14.39	64.3	42.2	19	77	168	108	2.7	6.4	3.7	312	5.39	8.75	1	4.51	2.47	0.88	2.03	8.4	61	51.8	0	0	1
1027976	1	61	167	65	23.3067	83	94	160	80	78	0	0	1	0	50.7656	119	1.483	4.53	17.82	69.3	41	33	64	171	89	4.3	8.2	3.6	485	5.52	5.25	1	4.17	0.88	1.23	2.44	7.1	130	153.3	0	0	1
1018062	2	76	165	90	33.0579	101	105	160	90	80	0	0	1	1	85.9821	121	3.18	4.51	14.82	70.8	42	26	91	199	85	2.6	5	10	407	6.22	9.13	1	5.42	1.38	1.5	3.54	7.5	58	96.9	1	0	1
1040973	2	55	160	62	24.2187	88	93	160	90	80	0	0	1	0	119.629	133	1.651	4.07	12.71	69.8	41.3	55	144	209	78	1.6	7.5	1.9	234	6.99	103.2	3	5.55	2.42	1.14	3.09	8.9	34	34.1	0	0	1
1023768	2	74	158	66.5	26.6384	92	96	160	70	82	0	0	1	0	72.3093	121	4.283	4.39	14.12	63.7	38.3	17	79	218	53	4.7	10.5	10	196	8	4.77	1	4.94	1.2	1.46	2.81	8.2	71	68	0	0	1
1038822	2	66	152	55	23.8054	78	85	160	90	84	0	0	1	0	96.2873	139	1.638	4.51	16.02	82	45.4	30	154	202	106	2.2	9.6	13.7	255	10.02	19.99	1	6.68	1.95	1.66	3.77	9.7	52	62	0	1	0
1012464	1	81	163	60	22.5827	78	85	160	80	84	0	0	1	1	60.5776	137	4.056	3.78	14.15	67.7	41.9	35	69	240	231	4	6.6	8.2	352	3.96	35.28	2	3.93	1.27	1.17	2.23	8.5	100	128.6	0	0	1
1039334	2	70	160	74	28.9062	91	99	160	80	86	0	0	0	0	79.7708	120	0.906	4.19	19.17	63.7	38.1	19	85	181	207	5	8.1	4.4	358	28.92	600	4	6.02	2.16	1.5	3.32	9.7	67	103.2	1	1	0
1033336	1	47	163	72	27.0993	95	98	154	118	80	0	0	1	0	99.2383	146	2.32	4.39	16.57	72.1	43.5	60	106	139	71	3.3	12.4	1.7	391	6.26	36.75	2	5.21	2.67	1.36	3	9.1	81	54.8	0	0	1
1031422	2	69	160	67	26.1719	95	102	152	94	76	0	0	1	1	51.3585	147	1.574	4.27	14.85	68.2	39.4	31	120	248	122	4.4	5.9	11.6	414	15.73	41.4	2	5.7	3.15	1.51	3.26	11.5	97	96.1	0	0	1
1014573	1	82	172	76.5	25.8586	88	98	150	90	60	0	0	1	0	48.1088	110	0.387	2.95	17.9	70.3	39.4	18	64	147	63	5	9.3	4.6	395	9.31	450	4	4.09	1.12	1.52	2.24	10.3	121	172	1	1	1
1017369	2	84	156	65	26.7094	88	96	150	70	70	0	0	1	1	36.4714	116	1.62	3.23	14.03	64.3	36.6	210	87	234	77	1.8	4.2	12.1	530	5.58	313.5	4	8.39	15.74	2.05	4.72	11.2	118	130	0	0	1
1033520	2	78	160	69	26.9531	90	98	150	90	72	0	0	1	0	109.801	118	2.497	4.45	15.11	71.4	40	39	92	219	69	10.3	21	28.1	269	5.48	16.26	1	3.6	1.11	1.18	2.24	6.9	27	57.1	1	0	0
1024113	1	84	170	63	21.7993	88	98	150	80	72	0	0	1	0	79.2289	155	2.338	5.2	15.61	75	45.3	22	84	167	97	3.4	9.4	9	367	8.09	26.39	1	6.35	1.66	1.81	3.48	7.1	77	74	0	0	1
1027875	1	53	175	95	31.0204	110	112	150	95	76	1	0	1	0	97.472	132	1.641	4.31	19.49	64.3	33.2	102	94	193	213	2.6	3.8	1.3	287	13.52	38	1	4.08	1.49	0.98	2.5	8.7	79	87.4	0	1	1
1037915	2	68	153	69	29.4758	98	105	150	80	76	0	0	1	1	46.4595	122	1.746	4.03	14.8	70	36.8	24	67	196	71	1.8	3.8	14.8	411	9.11	8.74	1	5.77	2.55	1.47	3.27	8.9	106	99	0	0	0
1013358	1	67	165	67	24.6097	86	94	150	80	76	0	0	1	0	62.2914	124	1.788	3.97	15.6	64.2	40.3	19	57	263	61	3.3	7.8	2.8	252	7.13	24.84	1	4.8	1.72	1	2.9	7.1	106	102.3	0	0	0
1017320	2	51	162	64	24.3865	85	93	150	90	76	0	0	1	0	111.391	145	6.697	3.89	14.61	59.7	33.3	31	46	211	108	1.8	4.1	2.1	357	9.9	46.1	2	6.99	3.7	1.28	3.9	12.4	46	77.9	1	1	0
1051001	1	46	172	93	31.4359	98	110	150	90	78	0	0	0	0	124.592	150	1.331	5.02	14.94	71.4	44.9	51	56	129	181	2.8	4.7	2.4	403	7.3	44.56	2	6.93	3.6	1.24	3.94	8.2	49	48	0	0	1
1045456	1	44	172	78	26.3656	107	98	150	90	78	1	1	1	0	111.797	159	1.133	4.8	17.95	75.5	41.9	40	61	197	179	4.5	6	8.8	300	13.31	900	4	8.09	19.04	1.78	4.31	10.3	66	97.7	1	0	1
1016992	1	60	170	50	17.301	74	90	150	90	78	1	1	1	0	70.2066	123	3.975	4.81	18.09	62.8	42.1	11	47	145	103	5.7	8.9	7	379	4.83	20.88	1	4.44	0.56	2.27	1.37	6.1	100	98	0	0	0
1019858	2	76	158	73.5	29.4424	101	103	150	90	80	0	0	1	0	91.5056	128	3.673	4.56	14.83	65.6	40	35	69	142	52	3.2	7.4	3	378	7.18	24.2	1	4.65	1.98	1.28	2.61	9.6	48	55.2	0	0	1
1012734	2	80	162	76	28.959	94	95	150	80	80	0	0	1	0	58.6557	128	0.608	3.82	16.77	63.1	39	23	187	226	61	3.3	9	15.6	388	17.55	217.5	3	4.57	1.22	1.17	2.64	9.5	82	109	1	1	1
1014547	1	68	172	82	27.7177	95	98	150	80	80	0	0	1	0	75.3863	137	2.619	4.25	17.57	62.2	40.6	30	94	173	163	3.3	5.1	6.6	244	12.85	83.8	2	3.65	0.7	1.16	2.11	9.5	90	102.2	0	1	1
1028359	1	76	167	88	31.5537	105	102	150	80	82	0	0	1	0	68.4968	139	1.898	4.4	13.92	76.8	38.8	52	114	314	269	4.5	7.5	11	310	11.69	7.65	1	4.25	1.13	1.55	2.17	7.4	93	107.5	0	0	1
1043033	1	50	170	90	31.1419	100	98	150	110	84	0	1	1	0	94.3452	154	1.831	4.89	14.16	74.1	44.7	134	55	164	122	4	14	8.2	601	8.13	26.24	1	5.95	7.04	1.3	3.33	6.8	83	74	0	0	1
1043009	1	54	165	77	28.2828	105	98	150	80	90	1	1	1	0	107.642	161	1.689	4.13	18.85	79.4	42.4	73	105	280	123	6	3.1	14.8	272	12	250.5	3	4.96	16.02	0.31	2.86	8.5	61	71.8	0	0	1
1049186	1	78	165	66	24.2424	87	90	150	90	116	0	0	0	0	84.9517	137	1.631	3.75	12.81	60.9	31.6	41	90	227	25	2.1	11.3	2.1	272	12.09	15.45	1	4.2	0.54	1.24	2.46	8.4	72	84.5	0	0	1
1022985	1	45	170	61	21.1073	85	85	146	96	84	1	1	0	0	89.8104	148	1.018	4.34	12.12	63.6	37.8	178	93	163	81	5.7	10.2	1.6	363	7.77	199.92	3	4.72	0.72	2	1.82	9	89	123.6	1	1	0
1051303	1	71	170	70	24.2215	85	95	145	70	76	0	0	1	1	85.8947	133	1.339	5.51	12.81	75	43.1	13	69	199	357	2	7.4	22.3	164	13.15	9.39	1	2.32	0.93	1.11	1.27	6.7	79	71	0	0	0
1042751	1	53	170	64	22.1453	82	89	145	85	84	1	0	0	0	104.301	144	0.424	5.68	16.54	67.6	47.1	59	67	133	84	3.1	8.5	2.8	318	12.74	31.2	2	3.14	1.37	0.77	2.05	8.9	67	83.2	0	1	0
1034939	1	74	161	51	19.6752	80	90	145	90	90	0	0	1	0	50.8898	140	0.71	4.05	16.23	57.4	33.7	27	89	127	34	5.1	8.5	2.3	337	27.49	19.53	1	5	1.36	1.59	2.72	14.6	121	79.4	0	0	1
1022357	1	65	168	71	25.1559	85	90	140	70	60	0	0	1	1	47.5833	121	1.328	4.21	16.24	72	42.8	18	69	152	132	4.9	8.8	2.6	413	7.21	10.01	1	3.27	1.26	1.09	2.02	8.3	134	143.4	0	1	0
1041386	1	72	164	58	21.5645	82	86	140	80	64	0	0	1	0	67.4237	114	2.981	4.28	13.33	71.4	42.4	20	50	221	197	2.7	6.3	16.4	473	3.41	7.86	1	3.91	0.94	1.04	2.28	6.3	97	87.5	0	0	1
1014577	1	72	165	77	28.2828	86	94	140	90	68	0	1	1	0	75.3164	154	0.818	4.48	15.45	62.7	39.7	54	65	224	101	1.7	4.7	8.2	300	6.69	600	4	5.69	2.18	1.16	3.95	10.8	88	176.2	1	0	1
1012540	2	79	162	81.5	31.0547	98	102	140	80	70	1	0	1	1	63.2913	124	0.695	4.05	14.73	65.8	37	31	63	205	250	10.3	3.2	6.1	484	5.6	1050	4	4.85	1.11	1.27	3.06	8.7	77	133.9	1	0	1
1030677	2	80	162	76	28.959	98	105	140	80	70	0	0	1	0	82.2451	129	1.708	4.22	16.26	72.9	40.9	38	220	237	75	3.8	12.4	5	104	11	217.5	3	5.06	2.13	1.44	2.86	8.4	62	109	1	0	1
1044886	1	68	175	80	26.1224	95	105	140	90	70	1	1	1	0	98.9061	139	1.533	4.95	18.73	60.7	40.2	50	78	202	106	6	12.8	7.6	317	11.71	55.2	2	4.78	1.09	1.69	2.42	10.5	59	56	0	1	1
1013475	2	75	168	58	20.5499	78	89	140	80	70	0	0	1	0	89.7556	110	1.349	3.32	16.44	65.9	37.8	9	42	176	66	2.2	6.8	10	269	32.63	6.2	1	5.73	0.79	1.49	3.39	13	52	83.3	1	0	1
1051546	1	69	167	55	19.721	69	85	140	80	70	0	0	0	1	91.5498	135	0.591	5.1	15.69	63.4	42.3	6	73	175	126	6	20	3.9	305	7.05	5	1	4.29	0.32	1.44	2.24	6.3	70	75.8	0	0	1
1026468	2	50	158	66.5	26.6384	95	98	140	90	72	0	0	1	0	103.211	140	1.641	4.74	16.36	72.7	40.7	20	72	148	76	2.8	6.3	2.2	325	13.42	4.37	1	5.48	1.69	1.36	3.21	11.6	58	41.8	0	1	1
1046863	2	67	160	60	23.4375	84	89	140	90	72	0	0	0	0	98.1647	132	3.579	4.38	15.38	69.3	39.4	14	116	167	108	3.3	9.9	6.8	141	10.5	28.98	1	4.87	0.75	1.52	2.66	8.1	48	58.8	0	0	1
1037937	1	58	170	64	22.1453	76	80	140	90	72	1	1	0	0	106.104	147	0.741	4.87	16.85	67.3	41.8	38	55	174	92	6.1	2.7	3	384	5.9	7.42	1	3.86	1.08	1.36	2.26	5.6	59	81.3	1	1	0
1037968	1	63	173	65	21.7181	85	89	140	80	72	1	1	1	0	103.904	143	1.373	5.12	17.91	63.1	43.9	22	74	171	153	5.2	16.9	5	267	6.5	62.31	2	4.48	2.15	1.17	2.73	6.3	57	67.3	0	0	0
1044645	2	67	158	54	21.6311	88	86	140	90	72	0	0	1	1	93.7724	124	5.375	3.75	11.6	69.5	43.3	89	146	298	187	3.6	9.1	5.9	247	9	10.1	1	5.83	1.25	1.99	2.79	8	54	54.1	0	1	0
1011604	1	64	168	61	21.6128	90	96	140	80	72	0	0	1	0	100.34	152	1.67	5.38	16.05	65.3	40.3	16	63	160	111	7.8	2.2	7.4	254	8.38	19.63	1	4.76	0.51	1.56	2.89	7.4	61	71.2	0	0	1
1042744	2	51	160	65	25.3906	82	90	140	80	74	0	0	1	0	102.489	128	3.133	4.52	14.87	68.2	38.8	62	68	169	50	3.3	8	2.8	202	5.7	10.35	1	3.99	1.35	1.21	2.21	6.7	58	59.7	0	0	1
1023498	1	53	170	73	25.2595	85	90	140	100	74	1	1	1	0	43.4132	137	1.207	4.49	23.09	64.4	38.4	70	99	150	49	1.8	3.8	1.9	693	22.02	21.06	1	5.91	3.2	0.95	3.57	9.6	155	140.2	0	1	1
1035853	1	63	175	80	26.1224	98	95	140	95	76	1	0	1	0	54.5932	123	3.615	3.09	14.46	63.7	35.3	116	68	177	60	9.7	4.2	10	504	18.99	1380	4	4.04	2.03	0.77	2.26	11.4	121	136.7	0	0	1
1015168	2	52	155	60	24.974	75	85	140	90	76	0	0	1	1	108.309	123	1.614	4.15	16.46	64.8	41.1	17	154	149	58	2.7	5.1	12.2	234	25.26	280.86	3	4.94	0.48	2.19	2.4	11.5	48	55.7	0	1	0
1042695	2	80	156	60	24.6548	92	96	140	70	76	1	0	1	0	44.0066	122	1.15	3.54	13.86	63	38.9	19	66	158	39	2.8	3.9	2.7	355	4.94	43.85	2	4.79	2.21	1.12	2.72	7.1	104	118.6	0	0	1
1021884	2	59	160	57	22.2656	85	90	140	80	76	0	0	1	0	51.2397	111	1.449	4.21	19.35	66.2	39.6	38	102	205	73	3.8	6.7	6.9	408	12.77	71.24	2	4.48	4.51	1.03	2.64	13.2	103	137	1	0	1
1032890	1	50	170	60	20.7612	88	90	140	80	76	1	0	1	0	92.989	140	3.61	4.03	17.11	68.7	38.9	32	82	190	74	3.2	1.5	11.8	317	9.52	33.2	2	4.67	5.46	0.8	2.95	11.8	84	63.3	0	1	0
1023464	1	46	170	79	27.3356	90	90	140	90	78	1	0	1	0	86.8175	148	1.91	5	13.75	69.4	41	29	132	217	84	4.8	5.8	2.4	328	6.92	171.38	3	5.16	1.44	1.23	3.09	8.9	91	80	0	1	1
1053822	1	53	175	75	24.4898	92	95	140	90	78	1	0	1	0	97.472	169	0.453	5.48	14.73	73.2	45.4	21	84	150	131	3	9.1	8.9	356	7.4	60.3	2	4.72	0.65	1.12	2.64	10.1	79	69.3	0	1	1
1040975	1	73	173	73	24.3911	85	95	140	80	78	0	0	1	0	32.5751	137	4.689	4.59	12.15	60.2	36.4	35	66	128	129	5	9	1.8	402	4.7	108	3	2.59	1.34	0.82	1.42	7.1	175	111	0	0	1
1045207	2	64	160	62	24.2187	85	95	140	80	78	0	0	1	0	99.5535	130	1.862	3.79	14.56	76.9	41.9	24	60	151	101	4.9	8.2	4.1	251	6.66	23.15	1	4.85	2.07	1.33	2.74	7.6	48	44.7	0	0	1
1042240	2	55	158	56	22.4323	78	86	140	80	78	0	0	1	0	88.635	118	8.961	3.71	11.8	74.4	43.5	12	61	182	98	2.4	12.4	6.6	401	5.03	25.8	1	5.4	4.15	1.17	2.44	6.5	67	82.9	0	0	0
1010760	2	57	158	89	35.6513	120	114	140	100	80	0	0	1	0	65.5482	133	1.916	4.82	14.03	68.7	43.6	142	115	191	83	3.9	8	13	454	17.71	37.2	2	5.46	5.33	1.07	2.03	9.1	85	63.7	0	0	0
1049185	2	51	160	74	28.9062	92	95	140	100	80	0	0	1	0	102.633	139	7.544	3.75	12.12	64.7	35.1	22	50	133	57	2.5	7.1	6.8	412	11.04	1258	4	4.07	2.94	1.12	2.47	8.4	59	77.9	1	0	1
1028051	1	53	160	58	22.6562	80	86	140	70	80	0	0	1	0	77.476	133	0.08	14.92	40.56	65	40.3	59	104	180	69	5.2	8.9	2.4	204	6.12	7.3	1	3.36	1.43	1.05	2.04	5.4	96	56	0	0	1
1042096	2	66	155	44	18.3143	80	92	140	80	81	0	0	1	0	111.043	134	0.694	4.53	17.6	76.9	46.8	16	73	177	93	2.3	8.2	2.6	144	11.33	7.83	1	5.53	0.97	2.02	2.62	8.8	33	38	0	0	0
1017272	2	62	160	90	35.1562	102	105	140	80	84	0	0	1	0	74.8296	142	0.903	4.91	17.91	67.7	41.6	46	58	219	99	5	16.9	7.1	732	5.39	20.5	1	4.32	3.45	1.01	2.33	6.8	74	65.4	0	0	1
1027950	2	79	158	75	30.0433	105	110	140	80	84	0	0	1	1	64.2995	124	0.613	3.7	14.2	73.2	37.1	46	123	153	46	3.6	7.2	8.1	319	7.03	7.68	1	4.21	1.27	1.8	2.21	8.1	76	107.3	1	0	0
1016741	1	81	170	70.5	24.3945	84	91	140	90	84	0	0	1	1	63.6424	161	1.627	4.62	18.36	67.9	42.2	46	70	184	75	5	18.5	9.5	346	8.61	16.88	1	4.34	1.05	1.37	2.31	8.1	96	108.2	0	1	0
1048992	1	69	169	67	23.4586	82	89	140	90	84	0	0	0	0	98.2138	150	2.062	4.97	14.77	69.1	44.2	34	69	135	73	3.2	14.6	8.1	420	11.6	18.4	1	6.05	1.95	1.22	3.5	7.8	59	55.4	0	0	0
1011467	1	57	170	75	25.9516	88	92	140	80	85	0	0	1	1	81.4425	153	0.8	11.88	35.44	60.7	39.1	63	74	110	38	5.4	11.5	10	441	9.6	8.06	1	3.8	1.59	0.95	2.48	6.2	90	86.5	0	1	0
1010720	1	58	175	90	29.3878	90	100	140	80	88	0	0	1	0	100.09	130	3.52	4.09	12.65	65.7	40.1	22	55	162	187	2.7	5	6.1	364	7.82	8.34	1	4.46	1.23	1.12	1.88	7.9	68	75.3	0	0	0
1024183	1	60	175	75	24.4898	96	99	140	80	88	1	1	0	0	99.9118	149	1.974	4.8	14.84	65.8	40.6	48	72	155	288	10.5	22.5	8.5	445	4.85	8.4	1	6.28	1.47	1.5	3.52	8.5	66	76	0	0	1
1017741	1	18	168	64	22.6757	80	88	140	90	88	0	0	0	0	140.576	147	1.019	5.42	18.66	69.3	45.8	22	96	108	86	6	15.5	7.8	310	18.08	11.99	1	4.37	1.28	1.22	2.02	9.2	61	37.3	0	1	0
1027511	1	73	165	72	26.4463	95	95	140	90	89	0	0	1	1	73.7744	118	0.078	3.5	4.74	62.9	40.5	25	73	212	108	4.8	8.5	7.5	271	7.14	23.7	1	5.29	2.2	1.09	2.87	11.1	89	102.8	0	1	1
1053298	1	30	175	72	23.5102	86	94	140	100	100	0	0	0	0	107.016	172	1.561	2.99	14.31	56.8	38.3	17	117	153	108	3	13.5	4.2	197	22.73	12.5	1	6.21	1.43	0.99	3.61	13.1	84	83.7	0	0	0
1025730	2	67	156	70	28.764	86	94	138	80	70	0	0	1	1	47.877	129	5.818	3.3	15.95	75.7	39.3	21	88	219	190	4.3	6.8	12.3	341	9.02	27.84	1	4.42	2.57	1.29	2.43	7.6	104	93.4	0	0	0
1012071	1	46	179	105	32.7705	100	102	138	70	76	0	0	0	0	99.9379	159	1.12	4.16	13.81	76.7	46.3	59	65	207	224	4.7	11.4	11.1	363	7.4	15.28	1	7.99	2.29	1.8	5.13	9.4	81	67.8	0	1	1
1025327	2	49	162	81	30.8642	111	104	138	70	76	0	0	1	0	59.522	122	5.201	3.3	13.57	75	46.9	63	66	231	147	6.4	13.9	6	548	6.69	9.2	1	6.12	3.46	2.05	3.19	8.9	97	45	0	0	0
1038613	2	56	156	72.5	29.7913	90	92	138	70	76	0	0	0	0	99.5195	143	3.443	4.1	14.88	80	44.1	53	107	162	100	3.2	10	1.1	299	13.17	11.33	1	4.71	1.32	1.16	2.78	8.6	57	56.8	0	0	0
1028634	2	66	160	71	27.7344	95	105	138	70	76	0	0	1	0	95.6133	127	1.971	4.02	15.51	66.1	37.6	18	57	235	278	1.9	3.3	1.6	173	19.97	32.4	2	4.09	1.39	1.38	2.3	10.9	52	71.2	1	0	1
1025761	1	32	173	83	27.7323	90	92	138	70	76	0	0	0	0	97.0778	145	1.853	4.66	13.99	68.7	42.6	43	74	187	396	4.4	9.7	4.4	350	8.47	56.2	2	5.07	2.21	1.21	2.86	11.2	90	82.3	0	0	0
1013594	2	58	158	66	26.4381	85	93	138	70	76	0	0	1	0	88.3789	124	1.866	4.67	15.7	65.5	44.5	49	48	201	149	2.8	8.4	2.9	436	5.75	6.25	1	4.14	0.96	1.08	2.24	7.4	66	84	0	0	1
1048089	1	55	180	85	26.2346	90	96	138	70	76	0	0	1	0	103.483	151	2.34	4.36	16.61	64.9	42	22	82	133	112	5.8	4	2.7	415	9.91	157.5	3	4.73	2.24	0.92	2.94	10.5	66	59.6	0	0	1
1041767	1	82	172	72	24.3375	88	98	138	70	76	0	0	1	0	36.226	102	0.959	3.01	11.65	78.3	35.5	24	79	141	60	2.1	5.3	8.9	382	14.57	50	2	4.18	1.14	1.4	2.23	9.2	153	172	0	0	1
1033240	1	64	170	68.5	23.7024	85	86	138	70	76	0	0	1	0	101.725	144	1.853	3.9	14.96	76.6	47.5	38	50	300	194	5.1	6	3	547	8.37	4.5	1	3.99	1.79	1.39	2.25	6.8	59	67.4	0	0	0
1042283	2	76	160	53	20.7031	86	90	138	70	76	0	0	1	0	32.724	146	1.657	3.83	15.58	69.6	37.9	23	54	139	39	3.7	14.5	10	514	41.92	426.4	4	6.89	2.33	1.39	3.64	16.2	136	115	0	0	0
1020142	1	71	175	53	17.3061	70	70	138	70	76	0	0	1	0	85.8947	122	3.44	3.17	18.59	80	38.4	18	74	170	128	4.2	11.7	9.2	387	22.17	276.02	3	4.09	0.77	1.63	2.19	11.7	79	81.1	0	0	0
1022291	1	65	164	65	24.1672	78	89	135	80	76	1	1	0	0	88.0677	146	1.662	3.18	15.7	63.2	38.2	27	79	154	79	5	14.7	7	328	36.5	4.6	1	5.28	0.76	1.23	3.12	13.8	81	99.1	0	0	1
1053555	2	60	170	72	24.9135	91	92	135	75	79	0	0	0	0	62.4018	120	3.573	4.18	13.84	66	45.2	32	73	211	283	5	5.1	5.2	344	6.74	6.25	1	4.74	2.85	1.4	2.5	6.7	87	69.6	0	0	0
1021673	2	41	164	78	29.0006	105	110	135	70	80	0	0	1	0	118.66	137	3.11	4.17	15.7	71.9	42.9	78	106	243	120	2.6	6.3	10	231	10.89	128.79	3	6.71	1.98	1.59	3.65	9.4	46	36.2	0	0	0
1047981	1	80	168	78	27.6361	95	100	134	70	76	0	0	1	1	45.6945	122	11.542	4.72	12.53	63.9	37.9	26	37	165	184	5.2	2.6	5	456	9.2	250	3	4.2	1.45	1.27	2.44	7.3	127	176.8	1	0	1
1030280	1	85	170	77	26.6436	90	100	132	78	76	1	0	1	0	51.1668	132	2.253	3.73	17.76	69	37.4	31	68	162	53	6	7.1	7.4	482	9.25	44.25	2	4.49	3.92	1.14	2.6	8	113	195.9	1	1	1
1023836	1	66	166	73.5	26.673	92	100	130	60	60	0	0	1	1	60.6492	120	1.362	3.91	17.02	71	42.3	42	78	232	165	3.8	8.2	3.9	558	8.23	10.02	1	3.61	4.64	0.92	2.22	10	109	160	1	0	0
1025559	1	60	175	92	30.0408	102	101	130	80	64	0	0	0	1	77.653	139	1.11	4.62	15.57	72.5	40	67	83	142	85	5.1	8.3	3.4	456	6.52	44.96	2	4.17	2.41	0.98	2.42	6.9	92	76.4	0	0	1
1038765	2	66	156	69.5	28.5585	95	95	130	70	65	0	0	1	0	52.822	130	1.603	4.74	13.54	70.9	38.3	49	60	209	271	3.1	12.1	67	317	14.12	15.18	1	4.91	1.59	0.76	2.31	8.3	97	58.4	0	0	1
1037684	1	66	172	77.5	26.1966	89	98	130	80	70	0	0	1	1	84.3156	135	5.885	3.98	15.12	72.4	41.3	41	80	193	195	3.5	10.1	12.1	474	6.7	9.43	1	4.19	1.21	1.29	2.39	7	83	84.5	0	1	1
1017463	1	67	178	78	24.6181	89	94	130	80	70	0	0	1	0	93.3957	136	3.405	4.29	17.52	63.2	44.1	12	54	159	129	6	15	17.9	286	5.31	51.6	2	3.33	1.75	1.15	1.43	5.4	69	75.2	0	0	1
1019406	2	52	155	59	24.5578	91	96	130	80	70	0	0	1	0	109.062	128	2.174	4.24	15.04	67.5	43.3	53	48	202	132	4.3	9.9	4	289	12.86	45.76	2	4.46	5.65	0.96	2.59	7.4	47	58.7	0	1	1
1050937	2	64	168	68	24.093	86	95	130	80	70	0	0	1	0	100.245	128	1.709	4.71	15.67	69	42.7	15	71	194	123	2.3	12	4.9	232	11.79	11.27	1	5.7	1.95	1.25	3.23	9.9	47	47.8	0	0	0
1017460	2	80	164	60	22.3081	79	86	130	80	70	0	0	0	0	56.5727	125	0.999	4.59	21.79	67	41.9	16	37	194	161	6	7.3	11.3	367	4.12	9.87	1	4.33	1.64	1.17	2.09	6.4	84	101.8	0	0	0
1043467	1	77	175	63.5	20.7347	80	85	130	80	70	0	0	0	0	78.596	142	0.31	4.67	17.08	64.1	41.9	12	72	150	107	9.7	39.8	5.7	389	10.54	7.14	1	4.46	1.94	1.06	2.68	8.8	83	95.5	0	1	0
1042826	1	52	165	54	19.8347	75	85	130	80	70	0	0	0	0	100.833	139	2.009	4.56	17.41	59.8	39.6	14	92	98	67	4.3	9.8	3.3	264	11.7	7.51	1	3.06	0.8	1.04	1.53	10.8	74	88.7	0	0	0
1034220	1	75	170	55	19.0311	82	96	130	80	70	0	0	0	0	63.1854	133	2.279	4.33	15.05	64.1	39.7	20	96	184	152	4.8	7.4	5.7	337	4.96	10.93	1	5.29	1.2	1.8	2.77	8	100	97.7	0	0	1
1041940	1	56	160	73	28.5156	105	110	130	80	72	0	0	1	0	90.4514	165	0.46	4.45	18.27	69	41.1	24	52	136	94	3.2	9.3	1.1	201	8.35	160.38	3	4.68	1.71	1.2	2.65	11.5	83	84	0	0	1
1047627	1	86	170	66	22.8374	90	100	130	80	72	0	0	1	0	38.2773	115	0.975	4.18	13.22	60.7	37.4	59	67	145	129	6	5.4	13.5	416.6	24.97	4.09	1	4.31	0.86	1.17	2.49	12.5	142	276.9	1	0	1
1042292	1	65	166	53.5	19.415	75	85	130	80	72	0	0	0	0	93.6113	101	6.79	3.79	12.34	60.6	37.5	11	34	137	145	2.5	5.8	4.7	378	5.74	5.5	1	6.79	1.05	2.76	2.87	6.5	71	77.7	0	0	1
1038075	1	57	172	62	20.9573	88	92	130	70	74	1	0	0	0	107.605	134	0.83	3.41	13.82	63.8	39.3	16	78	167	75	2.9	10.7	7.4	302	42.84	8.74	1	3.68	0.99	1.42	2.09	15	58	70	0	0	1
1051507	1	72	170	94.5	32.699	100	96	130	70	76	0	0	1	0	86.1971	137	2.214	4.72	14.8	63.4	40.3	19	88	145	114	2.1	10.2	8.7	363	7.57	3.34	1	4.14	0.98	1.42	2.27	6.8	77	75	0	0	1
1019852	1	60	168	89	31.5334	105	110	130	80	76	0	0	0	0	102.512	151	5.168	4.25	16.07	75.4	44.7	42	46	154	99	4.1	5.9	8.1	402	6.8	24.2	1	5.22	2.64	1.09	3	6.8	62	55.7	0	0	0
1052215	1	37	178	98	30.9304	93	80	130	70	76	0	0	0	0	118.926	152	1.915	4.11	18.21	79.3	47	31	88	146	99	3.3	11.3	3.2	378	18.74	13.95	1	4.07	2.46	1.13	2.35	13.2	64	64.1	0	0	0
1008894	1	48	178	89	28.0899	93	98	130	70	76	1	0	1	0	86.7576	148	2.249	4.92	19.83	64.1	41.7	98	81	143	41	2.6	15.8	2.6	614	11.11	900	4	6.34	15.44	1.01	1.69	8.3	90	94.5	0	1	1
1028572	2	60	163	80	30.1103	105	99	130	95	76	0	0	1	0	108.601	147	3.772	4.65	16.14	74.9	43.7	97	97	165	86	3.9	8.8	5.2	420	21.73	47.16	2	5.45	9.88	0.92	3.28	9.7	41	50.1	0	0	1
1043456	1	58	170	82	28.3737	86	94	130	70	76	0	0	0	0	102.04	148	2.345	4.64	15.6	68.3	40.8	27	98	168	40	2.7	7.1	4.9	277	9.47	19.65	1	5.22	1.63	1.65	2.72	8.1	66	65.5	0	0	0
1017868	2	80	165	76	27.9155	101	116	130	70	76	0	0	1	0	68.1625	138	0.989	4.06	15.7	71.5	39.7	20	59	160	62	4.4	7.8	4.8	382	6.18	29.26	1	4.82	1.56	1.51	1.99	8.8	72	108.2	1	0	0
1030380	1	63	176	86	27.7634	90	100	130	60	76	0	0	1	1	96.6353	116	4.326	4.41	15.12	72.4	42.5	184	101	554	143	4	5.4	5.9	393	11.32	8.23	1	4.46	0.93	1.12	2.74	8.6	68	71.3	0	1	1
1020179	1	69	169	79	27.6601	94	102	130	80	76	0	0	1	0	20.9543	104	1	4.4	14.11	66	35.4	21	75	148	23	1.9	6.3	11.8	423	23.34	380	4	3.99	2.51	0.74	2.41	9.9	258	358.3	1	0	0
1051907	1	62	165	75	27.5482	90	90	130	70	76	0	0	1	1	61.0212	134	1.385	4.42	15.67	69.7	44.8	31	80	200	158	2	6.2	10.9	420	10.64	88.5	2	3.06	2.37	1.33	1.58	8	111	113.7	0	1	1
1021470	1	49	166	74	26.8544	90	100	130	70	76	1	0	1	0	119.05	140	1.16	0.09	17.74	66.3	38.2	21	69	164	136	2.2	4	3.1	292	18.67	241.5	3	4.53	2.95	0.92	2.7	13.8	52	64.6	0	1	0
1051203	1	45	176	83	26.7949	100	102	130	80	76	0	0	1	0	107.732	140	2.13	4.61	17.26	74.5	47.4	81	77	182	155	4.4	3.5	3.3	453	9.23	276	3	5.7	5.58	1.17	3.33	6.6	71	84	0	0	1
1043268	1	67	168	75	26.5731	86	94	130	70	76	0	0	1	0	70.2193	129	1.647	4.4	12.54	68.5	40.1	22	78	175	148	3.3	11	2.7	242	5.86	41.6	2	4.47	1.26	1.44	2.33	6.4	96	102.3	0	0	0
1030873	1	56	170	76.5	26.4706	92	95	130	80	76	1	1	1	0	100.899	142	1.042	4.08	15.08	78.3	43	43	143	168	213	6.6	16.2	5.9	207	12.62	15.94	1	5.14	0.88	1.57	2.79	11.1	69	73.1	0	1	0
1010710	2	81	158	65	26.0375	94	98	130	80	76	0	0	1	1	32.231	124	2.335	4.13	12.54	87.3	37.7	51	58	220	54	3.6	5.8	16.5	480	9.7	8.7	1	6.09	1.21	1.26	2.82	6.9	133	110.7	0	0	0
1031374	2	81	158	63	25.2363	85	94	130	70	76	0	0	1	1	40.1065	122	3.668	3.52	12.68	92.4	37.4	239	87	220	54	3.1	5.3	4.9	287	6.91	17	1	5.26	1.73	1.78	2.81	7.7	111	110.7	0	0	0
1050984	2	54	161	65	25.0762	79	90	130	80	76	0	0	0	0	103.373	116	1.085	2.6	13.29	66.7	41.4	11	73	182	155	4.5	2	4.8	257	13.21	27.68	1	4.46	5.15	1.23	2.59	8.3	53	53	0	1	0
1018038	2	68	158	60	24.0346	85	95	130	70	76	0	0	1	0	42.3972	144	1.702	3.19	12.88	79.4	40.3	181	116	189	40	2.7	4.1	3.9	406	5.07	690	4	6.4	1.52	2.18	3.15	9.7	115	120.5	0	0	0
1016931	2	68	158	60	24.0346	85	95	130	70	76	0	0	1	0	41.0975	133	1.702	3.19	12.88	73.4	38.1	124	128	189	40	3.4	3.9	11.5	379	23.24	11.93	1	5.55	1.49	1.55	2.87	9.7	118	120.5	0	0	1
1032660	2	62	160	61	23.8281	80	100	130	70	76	0	0	1	0	56.7647	115	2.07	4.15	16.47	70.4	41.1	29	75	214	225	1.4	3.7	8.8	223	8.81	9.37	1	5.98	1.34	1.96	3.24	7.8	93	80.4	0	1	1
1048220	2	58	152	55	23.8054	88	96	130	80	76	0	0	0	0	97.5712	137	2.142	4.37	17.46	79.5	44.8	10	75	218	127	3.6	8.1	6.1	291	4.64	9.5	1	5.59	0.91	1.56	2.87	10	58	74.3	0	0	0
1025326	1	60	165	64.5	23.6915	91	92	130	75	76	0	0	0	0	106.117	147	5.6	4.56	13.91	80.6	48.1	26	53	166	102	5.8	21.5	0.9	242	7	9.1	1	4.35	1.43	1.53	2.31	7.4	57	44.9	0	1	0
1044486	1	64	172	70	23.6614	86	94	130	80	76	0	0	0	1	90.2239	139	0.398	4.47	11.96	75	37.7	26	79	137	90	2.1	6.9	3.1	375	9.4	21.42	1	6.14	2.55	1.18	3.38	9.3	79	96.7	0	0	0
1029893	1	55	172	69	23.3234	86	94	130	80	76	1	0	0	0	92.4338	147	1.471	5.26	15.75	62.8	41.4	42	67	150	56	4.6	9	1.6	395	6.94	5.6	1	4.76	1.53	1.5	2.59	5.9	82	85.8	0	0	0
1051699	2	59	160	59	23.0469	90	95	130	70	76	0	0	1	0	60.3181	124	1.449	4.21	19.35	72.4	42.5	35	120	205	73	5.8	2.6	2.9	378	20.5	62.31	2	4.47	6.16	0.98	2.81	11.1	90	137	1	1	1
1029454	1	71	175	70	22.8571	81	92	130	80	76	0	0	1	0	71.8787	23	3.07	3.07	14.31	68.1	43.9	28	62	164	165	2.8	6.5	6.4	490	4.03	39	2	4.93	1.16	1.08	3.1	6.2	92	85.8	0	0	1
1021555	1	70	178	71	22.4088	83	82	130	80	76	0	0	1	0	81.9794	138	1.95	4.88	18.03	69.6	38.6	13	97	173	130	3.6	6.9	2.7	260	6.71	8.91	1	4.4	1.87	1.02	2.63	7.3	83	75.1	0	1	1
1035733	2	69	161	56	21.6041	81	86	130	70	76	0	0	1	0	86.5399	126	2.23	4.76	14.3	76.3	46.9	152	95	147	64	2.2	8.5	2.8	326	8.53	11.87	1	5.54	1.41	1.62	2.93	6.5	63	77.7	0	0	0
1053326	1	69	179	63.5	19.8184	70	76	130	70	76	0	0	0	0	98.2138	129	0.899	4.6	16.43	58	39.2	32	91	339	117	2.6	9.9	3.8	197	10.05	14.2	1	4.15	0.34	1.35	1.71	12.8	59	70.2	0	0	0
1049245	1	44	170	90	31.1419	110	106	130	90	78	0	1	1	0	82.5323	128	2.76	5.16	19.02	73.4	45.5	57	78	195	111	5.2	2	2.9	297	6.03	49.2	2	5.42	2.18	1.22	3.13	8.9	96	91.7	0	1	1
1031162	2	64	160	65	25.3906	95	100	130	90	80	0	0	0	1	92.5067	128	1.277	4.08	17.1	73.1	41.8	23	95	173	68	2.8	10.9	8.4	443	25.37	16.2	1	4.38	1.61	1.4	2.48	9.9	60	50.9	0	1	1
1027258	1	49	175	77	25.1429	85	102	130	95	80	0	1	1	0	93.6446	132	1.219	4.49	15.26	71.8	44.2	61	75	159	75	3.7	8.1	3.5	462	7.7	7.5	1	5.14	2.06	1.49	2.9	6	84	80	0	0	0
1020806	1	51	172	74	25.0135	88	96	130	80	80	0	0	0	0	83.8212	142	1.602	4.89	18.84	66.5	39.8	90	76	166	189	3.2	9.6	3.9	409	5.44	11.28	1	5.64	3.17	1.44	3.15	7.2	91	76.2	0	0	0
1017357	1	71	175	70	22.8571	81	92	130	80	80	0	0	1	0	90.808	127	3.072	4.89	14.31	62	42.4	26	53	164	165	3.2	6.1	5.6	407	3.39	18.54	1	5.22	1	1.01	2.8	7.4	69	85.8	0	0	1
1034064	1	46	170	60	20.7612	88	92	130	80	80	1	1	0	0	108.893	130	4.531	3.83	12.85	58.6	40	95	91	151	5	4.8	13.6	10	255	16.89	6.55	1	5.54	6.58	1.03	3.2	9.3	68	67.6	0	1	0
1018084	2	53	162	71	27.0538	90	95	130	90	84	0	0	0	0	102.233	128	3.037	4.46	12.77	74.4	45.2	111	88	162	56	3.3	8.2	4.6	255	7.44	26.1	1	4.74	3.71	1.33	2.26	6.7	56	54	0	0	0
1017409	1	57	170	75	25.9516	93	98	130	80	85	1	1	1	0	101.411	130	0.464	3.58	14.97	60.1	37.7	31	87	287	2492	4.9	6.1	11.8	363	13.6	750	4	5.04	1.16	1.22	2.37	6.9	67	77.6	0	0	1
1033101	1	66	172	77.5	26.1966	89	98	130	80	86	0	0	1	1	77.4927	134	1.676	4.51	15.6	71.3	40.9	54	73	193	195	5.8	9.2	13	494	6.39	9.43	1	2.58	1.02	0.96	1.47	7	89	84.5	0	0	0
1053070	1	49	170	72	24.9135	88	96	130	80	86	0	0	0	0	113.825	149	1.08	4.35	15.73	72.3	40.6	71	95	156	59	5.5	3.3	4.6	256	9.23	47.5	2	4.98	2.1	1.29	2.78	10.6	58	71.9	0	1	0
1053473	1	52	167	68	24.3824	85	92	130	80	86	0	0	0	0	103.162	154	3.043	4.05	14.97	72.8	48.7	20	72	144	81	3.7	6.7	2	456	8.94	15.1	1	5.56	0.73	1.26	3.15	11.2	70	71.6	0	0	0
1041172	2	84	155	65	27.0552	96	106	130	80	88	0	0	1	0	82.3262	138	2.489	4.06	15.53	72.6	39.3	11	107	190	146	4.8	11.3	9.5	276	12.31	31.8	2	4.91	1.52	1.75	2.43	7.5	57	67.6	0	0	1
1008073	2	68	158	63	25.2363	84	101	130	80	88	0	0	1	1	66.2886	126	5.352	3.95	12.54	71.7	39.4	16	60	194	46	1.6	3.2	2.4	364	9.47	44.16	2	4.84	2.68	0.86	2.87	8.8	79	81.3	0	0	1
1031492	2	67	163	66	24.841	86	93	130	80	88	0	0	1	0	56.2652	118	1.459	4.27	15.9	67.5	39.2	23	90	206	119	2.9	5.7	2	302	3.96	8	1	4.75	1.01	1.7	2.46	8.2	91	71.5	0	0	1
1019297	1	53	175	90	29.3878	90	80	130	80	90	1	0	1	0	77.476	113	3.072	4.03	17.34	70.3	40.3	42	50	232	140	2.8	4.3	2.5	184	6.02	9.49	1	5.71	2.21	0.8	3.38	7.3	96	74.2	0	1	1
1049971	2	77	155	53	22.0604	88	87	130	80	90	0	0	0	0	61.2883	122	1.395	3.78	16.5	52	32	14	59	185	180	4	2.2	27.7	163	49.02	10.68	1	4.97	1.51	1.62	2.77	14.3	80	62.8	0	0	0
1043025	2	79	158	73	29.2421	103	110	130	85	98	0	0	1	1	53.8557	119	0.83	3.9	13.4	66.5	35.4	26	88	138	41	2.5	5.9	6.5	385	8.72	7.68	1	3.88	1.2	1.54	1.88	7	88	107.3	0	1	1
1054568	2	20	165	71	26.079	87	93	127	88	76	0	0	0	0	136.552	136	2.028	4.34	13.65	62.8	44	7	74	143	78	2.5	12.5	4.8	339	23.73	8.75	1	3.49	0.49	1.55	1.51	5.9	47	50.2	0	1	1
1048834	1	70	176	95	30.6689	100	102	125	70	62	0	0	1	0	84.433	149	3.671	4.81	13.5	63.5	39.6	31	40	189	227	3.1	8.3	3.9	515	6.71	7.5	1	4.55	2.1	0.87	2.82	7.4	81	71.5	0	0	1
1030398	2	54	160	56	21.875	80	90	125	80	70	0	0	0	0	102.739	121	1.35	4.23	15.4	74.9	44.3	23	72	129	56	2	3.6	4	217	11.08	8.6	1	5.67	2.34	1.31	3.33	8	54	59	0	0	1
1032679	1	21	178	73	23.04	70	75	125	75	80	0	0	0	0	80.2114	156	2.49	1.6	87.7	72.8	48.7	19	85	164	208	4.8	14.2	3.9	408	5.03	5.18	1	3.66	1.18	2	1.9	5.3	113	89.9	0	0	0
1044013	1	58	167	70	25.0995	89	92	124	80	78	1	0	0	0	86.6587	142	2.132	4.49	13.9	75.4	42.6	50	130	207	162	3.1	5.5	4.5	449	15.38	24.75	1	5.48	4.09	1.06	3.11	10.6	85	109	0	0	0
1036887	2	76	156	63	25.8876	86	92	124	80	86	0	0	1	0	58.1849	137	0.813	4.72	16.55	77.7	44.8	21	137	219	112	5.1	16.1	10	304	8.56	28.8	1	5.45	1.87	2.02	2.73	8.7	84	86.9	0	0	0
1038417	1	67	174	61	20.148	78	83	120	70	60	0	0	0	0	91.9008	130	0.841	4.24	16.94	62.7	40.4	13	96	170	117	3.7	8.7	4.6	264	8.19	9.15	1	4.1	1.02	1.46	2.33	8.2	73	82.4	0	0	0
1051375	1	74	170	77	26.6436	80	89	120	70	68	0	0	1	0	72.7845	129	2.926	4.95	13.37	66.3	42.7	22	59	135	44	2.3	7	5.2	357	9.53	30	2	5.56	1.54	1.5	3.13	8.2	90	98.3	0	0	1
1035264	2	81	152	72	31.1634	100	105	120	80	70	0	0	0	1	44.4235	132	1.522	4.12	13.78	74.9	37.7	49	64	144	53	4.3	10.5	24.5	330	25.7	13.1	1	4.87	1.84	1.33	2.64	11.2	102	81.8	0	0	0
1028350	1	38	172	82	27.7177	86	96	120	70	70	1	0	1	0	110.641	144	0.732	5.21	14.37	66.6	42.7	124	71	214	120	6	16.1	5.3	307	6.21	7.52	1	5.13	1.91	1.32	2.97	9.3	75	87.7	0	0	1
1037323	1	62	170	70	24.2215	85	90	120	80	70	0	0	1	0	92.968	108	1.244	4.72	14.8	65.9	40.3	13	68	115	119	3.5	16.2	3.8	429	7.15	14.56	1	3.13	0.76	1.11	1.6	6.1	76	99.9	1	0	1
1043476	1	42	175	74	24.1633	76	82	120	70	70	1	0	0	0	84.7664	165	0.841	5.41	18.47	68.8	48.2	58	85	141	65	3.1	13.7	2.4	322	10.37	7.23	1	4.89	1.8	1.16	2.86	7.7	95	80.7	0	0	0
1045916	1	61	165	56.5	20.753	75	85	120	80	70	1	0	0	0	96.279	126	0.764	4.23	12.68	68.3	40.4	19	79	127	69	8	9.8	1.4	338	8.65	13.62	1	4.28	0.89	1.45	2.19	8.3	71	63.9	0	0	0
1042596	2	73	163	75	28.2284	92	98	120	80	72	0	0	1	1	75.3785	114	0.809	4.52	15.09	64.9	40.4	19	81	178	180	2.7	11.9	2.6	344	6.26	4.81	1	4.33	1.91	1.49	2.21	6.5	69	65.5	0	1	0
1051690	1	47	175	85	27.7551	89	93	120	80	72	1	1	0	0	110.859	149	1.641	4.53	18.05	70.7	45.2	91	60	138	118	5.5	2.3	8.1	341	8.63	13.58	1	5.5	4.47	1.65	3.07	7.7	64	62	0	1	1
1044460	2	78	160	67.5	26.3672	92	95	120	70	72	0	0	1	0	83.8422	126	1.315	4.92	13.29	65.1	38.2	18	65	179	83	3.6	8	4.8	325	5.97	8.33	1	3.49	1.07	1.69	1.43	6.7	60	111	1	1	1
1041059	1	46	178	80	25.2493	86	90	120	70	72	1	1	0	0	110.237	139	2.241	4.09	11.5	76.7	46.7	49	83	149	176	1.9	6.9	1	290	5.51	54.2	2	6.79	2.15	1.3	3.78	8.4	66	65.4	0	0	0
1027056	2	66	150	43	19.1111	71	88	120	70	74	0	0	0	1	78.3607	122	21.301	2.52	10.57	89.4	42.8	27	79	163	80	3.8	7.1	3.6	190	7.34	18.12	1	6.18	0.76	2.59	3.14	9.1	70	66	0	1	0
1038460	1	42	170	72	24.9135	92	105	120	70	75	1	0	0	0	108.777	156	1.8	4.95	19.77	71.6	43.1	21	74	162	126	4.1	2.7	3.5	305	12.99	12.6	1	6.11	11.7	0.82	3.79	7.4	73	75	0	1	0
1018774	1	42	171	80	27.3588	95	82	120	80	76	0	0	0	1	110.026	156	1.392	4.94	17.87	70.7	44.5	26	84	163	68	3.1	6.7	3.1	433	12.58	35.82	2	5.94	3.09	1.17	3.55	11.3	71	69	0	0	0
1050295	2	69	160	67	26.1719	95	102	120	80	76	0	0	1	1	42.7019	144	1.57	4.27	14.85	66.3	38.5	29	114	193	103	4	1	12.1	384	14.48	41.4	2	5.27	2.35	1.51	2.92	9.3	113	96.1	0	0	1
1023899	1	36	176	80	25.8264	88	92	120	80	76	1	0	0	0	74.8768	152	2.953	4.36	17.3	64.9	45.4	35	83	143	87	4	8.5	5.5	520	30.49	11.09	1	5.47	4.35	1	3.14	12.1	109	92.2	0	0	0
1044123	2	41	165	70	25.7117	80	85	120	70	76	0	0	0	0	25.6022	141	1.465	5.04	15.06	70.6	42.7	24	80	112	74	3.2	10.3	5.7	295	15.37	11.24	1	5.92	2.21	1.68	3.08	8.1	203	44.9	0	0	1
1019214	2	58	167	71	25.4581	90	98	120	80	76	0	0	1	0	97.024	113	1.6	3.78	14.96	67.6	40.8	12	91	121	80	3.2	4.6	2.7	266	18.01	16.73	1	6.83	3.54	1.33	3.93	9.7	59	52.5	0	0	1
1036972	1	34	173	75	25.0593	88	95	120	80	76	1	0	0	0	136.703	155	0.285	4.71	16.49	71.2	45.3	88	81	152	56	4.2	8.9	4.1	291	11.85	4.36	1	7	3.47	1.13	4.04	8	48	61.8	0	0	0
1042504	2	65	160	61	23.8281	86	95	120	95	76	0	0	0	0	91.361	126	0.841	3.31	16.51	66.3	38.2	295	225	182	56	7.6	9.5	39.9	378	26.77	12.96	1	4.46	1.54	1.52	2.25	10.5	61	70	0	1	1
1045999	1	54	167	66	23.6652	95	98	120	80	76	1	1	1	1	104.869	152	0.553	5.45	20.2	62.6	41.2	35	112	168	156	3.2	6.5	2.1	223	15.44	56.76	2	4.12	0.79	1.4	2.23	8.5	65	77.4	0	0	1
1018174	1	35	178	73	23.04	80	81	120	70	76	0	0	0	0	135.746	147	0.689	4.36	12.06	61.7	38.2	21	125	156	104	2.2	3.1	23.4	286	16.16	9.25	1	4.67	2.14	1.39	1.89	12.4	48	39	0	0	0
1028106	2	48	160	58.5	22.8516	78	85	120	80	76	0	0	0	0	36.3063	132	4.347	4.96	16.24	61.2	37.1	20	72	172	71	2.4	7.1	2.5	317	6.41	9.24	1	5.38	1.26	1.61	2.94	10.5	146	58.1	0	0	0
1023571	2	74	160	57	22.2656	87	94	120	75	76	0	0	1	0	56.557	113	1.042	3.27	11.32	63	38.9	33	49	137	88	5	9.5	5.2	347	11.51	14.25	1	4.63	1.24	1.37	2.63	6.5	87	74.8	0	0	0
1042315	1	58	179	71	22.1591	92	95	120	90	76	1	1	0	0	91.8589	149	2.411	4.73	15.1	73.8	45.1	19	65	169	132	4.4	14.1	12	167	10.81	13.52	1	6.2	2.18	1.73	3.15	7.1	81	77.1	0	1	1
1044651	1	19	177	66	21.0667	81	92	120	80	76	0	0	0	0	131.634	137	1.314	5.33	13.15	72.9	43.4	17	89	245	320	2.7	8	4.7	401	3.96	13.6	1	4.42	0.88	2.14	2.01	9	68	67.1	0	0	0
1019669	2	72	157	51.5	20.8933	80	90	120	80	76	0	0	0	0	92.905	104	1.647	3.78	15.35	72.4	38	86	75	136	76	3.4	7.8	8.9	245	5.4	83.07	2	5.12	0.92	1.94	2.5	8.5	51	62.7	0	0	0
1017238	1	29	163	55.5	20.889	75	92	120	70	76	0	0	0	0	105.495	132	0.85	4.37	15.62	65.3	43.8	12	47	144	83	2.7	4.8	3.5	344	4.7	2.75	1	2.8	0.83	1.13	1.16	5.7	85	58.3	0	0	0
1017155	1	54	168	56.5	20.0184	80	88	120	80	76	1	0	0	0	105.539	151	0.523	4.18	19.38	68.1	35.8	42	76	148	27	4.3	5.6	28.4	197	11.81	20.7	1	3.35	0.63	0.96	1.7	11.3	64	67.7	0	0	0
1038176	1	42	175	81.5	26.6122	100	103	120	70	78	0	0	0	0	67.2834	143	2.52	4.69	15.25	64.8	42.2	27	75	159	140	2.4	10.2	2.8	393	6.89	14.94	1	6.1	0.94	1.72	3.38	7	115	67	0	1	1
1040340	1	72	165	70	25.7117	85	90	120	80	78	0	1	0	0	67.7958	143	1.666	4.54	22.42	76	39.2	25	77	182	140	3.4	4.9	191.5	259	10.24	35.4	2	3.96	1.09	1.46	1.97	7.6	96	95.2	0	0	0
1045851	1	53	165	68	24.977	82	89	120	70	78	1	0	0	1	101.398	162	1.098	4.53	15.02	66.6	41.8	34	118	187	112	6	15.9	16.7	230	19.84	16.8	1	3.82	1.49	0.93	2.33	8.5	73	92.2	0	0	0
1042393	2	61	160	62.5	24.4141	80	85	120	80	78	0	0	0	0	106.24	111	0.722	4.52	14.69	71.7	40.6	22	69	167	215	22.6	11.5	14.1	121	5.59	240	3	4.87	2	1	2.8	9.4	42	44.2	0	0	0
1044254	1	57	170	69	23.8754	85	95	120	100	78	1	0	0	1	80.3617	141	1.844	4.8	15.78	65.6	42.1	28	67	154	76	6	16.7	0.9	409	5.7	6.25	1	3.41	2.24	1.05	1.92	10.4	91	86.3	0	1	0
1027473	2	67	159	84	33.2265	102	105	120	80	80	0	0	1	1	80.0234	93	2.358	3.7	15.61	67	35.4	33	39	171	90	3.1	4.6	0.9	633	4.56	57.98	2	3.55	3.28	0.75	2.25	7.3	68	64.9	0	0	1
1046167	1	51	174	85	28.075	86	90	120	70	80	1	0	0	0	108.487	145	2.015	4.54	17.66	63.2	37.3	24	48	156	81	2.7	11.4	2.9	211	19.86	26.52	1	4.94	4.44	0.98	2.92	10.3	63	77	0	0	0
1047067	2	69	154	62	26.1427	79	89	120	80	80	0	0	0	0	91.3645	123	1.782	4.68	14.79	69.9	41.1	28	90	209	73	2.3	4.2	10	354	9.52	13	1	4.47	2.55	1.03	2.72	6.3	56	51.9	0	0	0
1054013	2	76	160	66	25.7812	90	93	120	70	80	0	0	1	1	67.8208	129	1.39	4.36	16.31	71	43.6	23	57	268	278	6	4.8	106	137	4.92	86.26	2	3.35	1.58	1.21	1.61	8.2	74	51	0	1	1
1033257	1	62	173	77	25.7276	92	96	120	80	80	0	0	0	0	91.5004	147	1.628	4.52	15.62	63.6	38.5	129	73	117	85	5.6	11.2	8.8	383	25.27	5	1	4.88	3.54	0.97	2.98	10.5	79	91.8	0	0	0
1015069	1	45	174	77	25.4327	88	98	120	90	80	0	1	0	0	111.797	142	1.204	3.8	14.51	65.6	42.5	57	107	175	177	4.2	4.5	6.9	248	12.31	45.45	2	8.44	18.22	1.81	6.38	10.2	66	112	1	0	0
1028532	2	70	165	68	24.977	90	100	120	80	80	0	0	0	0	78.3547	133	1.086	4.19	13.81	66.9	41.6	72	96	213	85	2.8	6.4	4.8	286	8.28	9.54	1	5.87	1.4	2.07	3.14	8.4	68	94	1	1	0
1052375	1	72	173	73	24.3911	80	86	120	80	80	0	0	1	1	60.1415	144	1.48	5.16	14.85	60.5	35.1	32	54	214	159	4.3	7.8	4.4	302	9.1	8.36	1	2.64	0.96	1.08	1.64	8.8	106	91.7	0	0	1
1017760	1	60	170	68	23.5294	89	93	120	50	80	1	0	0	0	94.798	135	1.052	4.33	18.48	64.2	39.9	33	90	181	211	5.4	10.6	3.5	352	7.54	9.07	1	4.14	1.3	1.14	2.03	9.3	75	80	0	0	1
1030882	1	74	165	62	22.7732	80	85	120	65	80	0	0	1	0	69.4659	143	3.091	4.55	18.61	69.3	40.2	29	83	206	94	3	7.5	3.5	374	4.05	6.25	1	4.3	1.92	1.34	2.5	7.1	93	97.9	0	0	0
1030355	1	27	172	51	17.239	70	72	120	80	80	0	0	0	0	117.618	140	1.807	4.25	14.71	70.2	42.9	20	86	126	93	3	8.2	3.3	410	5.86	5.2	1	4.24	0.51	1.37	2.47	7.8	78	60.3	0	0	0
1050977	2	20	162	47	17.9089	82	84	120	80	82	0	0	0	0	151.901	119	1.085	2.6	13.29	58.8	35.4	11	72	123	103	4.5	2	7	299	19.29	21.13	1	5.47	0.97	1.32	3.13	12.8	34	37.4	0	1	1
1014700	1	34	183	103	30.7564	110	112	120	80	84	0	0	0	0	134.429	148	0.936	4.46	14.68	65.9	38.6	62	74	187	76	5.5	9.4	2.9	514	8.31	390	4	5.15	9.76	0.92	3.62	9.7	50	67	1	0	0
1020391	1	63	171	80	27.3588	95	102	120	70	84	0	0	1	0	96.0572	146	0.979	4.28	17.1	76.4	45.3	18	96	182	192	6	18.4	2.2	347	14.76	26	1	5.27	1.88	1.94	2.73	12.2	69	61.5	0	0	0
1047362	1	51	165	73	26.8136	105	110	120	80	84	1	1	0	0	105.777	152	0.599	4.66	17.47	72.9	40.8	225	90	144	121	2.3	9.3	2.5	271	14.5	30.06	2	8.37	4.46	1.89	4.46	10.4	67	58	0	0	0
1053433	2	44	164	65	24.1672	93	88	120	80	84	0	0	0	0	64.4157	112	2.008	4.02	11.52	67.8	41.8	13	71	168	76	3	6.2	19.9	240	15.24	7.5	1	3.89	0.79	1.35	1.77	5.4	93	54.5	0	0	1
1048254	1	80	163	60	22.5827	80	86	120	80	88	0	0	1	1	81.6271	155	1.586	5.06	13.75	72.9	42.5	32	114	210	147	6	8.9	3.2	265	26.18	50.8	2	3.9	0.72	1.27	1.9	8.8	78	65.1	0	0	1
1022611	2	44	158	45	18.026	72	86	120	80	88	0	0	1	0	143.916	111	1.555	4.02	16.26	76.4	44.3	25	84	154	64	2.3	6.1	1.2	142	14.49	22.6	1	4.74	1.25	1.74	2.5	10.2	24	43.7	1	0	0
1034660	1	64	170	65	22.4913	88	92	117	72	92	0	0	0	0	71.7148	133	0.744	4.55	15.36	68.7	38	37	85	151	126	3.3	9.1	7.6	238	18.34	9.21	1	5.74	1.15	1.51	3.19	9.2	96	65.9	0	0	0
1052668	1	47	165	69	25.3444	89	92	115	70	72	0	0	0	0	106.85	120	1.344	4.58	14.81	71	47.8	20	55	121	101	2.1	10.1	7.1	370	7.06	7.95	1	4.5	1.92	1.18	2.63	6.9	70	73.6	0	0	0
1042485	1	58	170	80	27.6817	100	105	115	75	80	1	1	1	1	90.5062	124	3.161	4.03	14.84	71.5	35	159	98	208	139	2	4.4	4.2	289	15.12	77.76	2	4.8	1.13	0.96	2.7	7.2	82	63.7	0	0	1
1019282	2	19	168	56	19.8413	87	85	111	51	136	0	0	0	0	61.5262	120	0.64	3.69	13.01	34.7	23.1	26	51	211	60	3.1	0.7	6.2	591.9	10.1	24.55	1	1.57	1.03	0.6	0.46	13.3	111.7	62.5	0	0	0
1017335	1	67	170	63	21.7993	86	95	110	62	66	0	0	1	1	77.4927	128	1.658	3.99	16.8	60	38.1	53	98	180	107	2.4	3.9	13	455	16.1	92.8	2	4.91	0.89	1.38	2.46	12	89	137	1	0	1
1028410	2	54	158	62	24.8358	89	103	110	70	72	1	0	0	1	46.4512	119	0.353	4.56	16.17	66.6	39.6	47	77	163	146	6	16.3	9.9	155	14.95	20.1	1	5.33	3.88	1.26	3.07	7.2	115	73.9	0	0	0
1024655	1	74	158	60	24.0346	100	105	110	70	72	0	0	0	1	64.4087	157	1.765	4.51	17.08	69.1	39.9	24	69	228	80	5.7	9.6	120.8	276	6.02	12.03	1	3.93	0.85	0.99	2.29	7.2	99	87.7	0	1	0
1049925	2	53	165	62.5	22.9568	88	90	110	70	72	0	0	0	0	93.2436	126	5.721	4.48	16.24	58.8	39.7	18	87	172	102	3.5	9.2	2.5	420	7.34	5.85	1	5.13	1.06	1.55	2.48	6.3	65	64	0	0	1
1041929	1	33	174	83	27.4145	95	98	110	70	74	1	0	0	0	121.538	133	2.369	5.54	19.37	61.3	38.9	17	67	167	256	3.4	13.4	0.6	327	6.84	82.6	2	6.27	1.57	1.37	3.31	12.6	65	82.6	0	1	0
1031152	1	50	170	83	28.7197	90	94	110	70	76	1	1	0	0	58.0682	145	1.105	4.15	13.61	69.7	43	32	77	109	62	4	9.5	5.7	256	6.93	55.08	2	4.22	2.81	1.09	2.54	7	124	67.5	0	0	0
1044586	1	34	170	81	28.0277	103	100	110	80	76	0	0	0	0	120.034	141	1.45	4.79	15.04	70	43.5	30	111	139	90	3.2	8.4	7.2	425	23.42	31.9	2	4.12	5.44	0.79	2.43	11.4	67	78.6	0	0	0
1011757	2	44	165	73	26.8136	89	98	110	70	76	0	0	0	0	117.029	148	1.929	4.17	15.44	65.5	42.4	15	59	157	78	14.5	4.2	2.2	243	7.86	9.79	1	5.18	0.82	1.32	3.16	6.8	45	45.7	0	0	0
1032348	1	59	170	71	24.5675	80	90	110	70	76	1	0	1	1	87.2921	160	0.647	5.3	14.85	73.3	45.4	30	60	206	126	4.7	13.7	4	303	5.92	33.25	2	5.03	1.7	1.39	2.95	5.8	84	64	0	0	1
1036007	1	57	176	76	24.5351	92	95	110	70	76	0	0	0	0	76.2891	148	2.43	4.4	13.99	69	43.2	25	60	163	93	3	6.4	6.9	386	6.02	13.08	1	5.85	2.38	1.17	3.32	5.8	95	96.8	0	0	1
1028994	1	46	176	73	23.5666	86	94	110	80	76	1	0	0	0	99.1604	140	2.438	4.59	13.78	73.8	44.1	25	80	217	131	4.3	8.4	1.8	333	7.66	7.07	1	4.1	2.98	1.07	2.48	8.1	82	97.1	0	0	0
1050522	1	46	187	78	22.3055	86	96	110	70	76	1	0	0	0	107.603	124	4.42	4.67	16.48	73	45.1	33	91	223	88	2.9	2.5	6.5	518	8.75	14.84	1	5.48	2.89	0.98	3.21	6.7	70	63	0	1	0
1041908	1	57	176	65	20.984	84	90	110	70	76	1	1	1	0	109.168	131	0.581	4.48	14.24	55.4	36.4	13	86	119	48	2.4	8.8	2.3	160	21.68	21.57	1	4.56	1.16	1.13	2.57	13.2	56	80.7	1	0	1
1045107	1	62	175	74.5	24.3265	87	92	110	70	78	0	0	0	0	43.45	136	0.317	3.27	13.83	71.2	38.1	27	90	151	79	3.4	8.9	9.5	404	17.99	141.05	2	4.7	2.65	1.1	2.78	10.5	147	146	0	1	0
1032497	1	49	170	68	23.5294	85	88	110	70	78	1	1	0	0	58.4776	151	1.119	4.71	13.38	72.1	45	99	47	137	66	3.7	11.7	1.6	347	8.09	21.6	1	5.73	1.69	1.83	3.1	6.6	124	73.1	0	0	0
1028568	1	82	169	76	26.6097	107	110	110	75	80	0	0	1	1	29.9574	108	0.965	3.85	15.12	73.5	37	31	70	230	182	2.9	3.3	4	607	4.26	11.7	3	4.74	0.96	1.35	2.83	5.8	178	154.8	0	0	0
1052014	1	29	172	74	25.0135	85	92	110	70	80	1	0	0	0	123.454	152	1.653	4.33	15.46	61	42.8	13	86	131	69	3.6	10.8	4.7	287	21.51	37.24	2	6.77	2.19	1.1	3.89	15.8	67	88	1	0	0
1027604	1	34	170	67	23.1834	85	100	110	70	80	1	0	0	0	71.9283	146	0.751	4.67	16.71	65.5	42.8	24	52	184	273	5.2	11.1	0.9	308	13.19	8.08	1	3.83	0.73	1.3	2.22	9.1	114	64	0	1	0
1016505	1	34	174	82.5	27.2493	95	100	110	70	85	1	1	0	0	115.065	164	2.135	4.02	15.65	60.2	40	26	91	189	74	5.2	8.6	8.9	272	28.87	53.38	2	4.81	2.7	1.03	2.51	10	73	64.4	0	0	0
1045372	2	45	158	61	24.4352	83	93	110	80	85	0	0	0	0	106.301	133	0.656	3.77	15.26	73.9	45.2	61	91	137	43	4.1	10.4	2.1	296	15.35	21.83	1	3.69	1.76	1.13	2.22	9.9	59	53.1	0	0	0
1040064	1	18	175	43	14.0408	60	65	110	70	110	0	0	0	0	138.725	129	1.103	3.67	13.48	65	40.7	37	216	166	83	4.2	11.4	7	310	27.28	11.4	1	4.49	0.99	1.11	2.45	10.3	63	85.4	1	0	0
1043783	1	51	168	65	23.03	74	78	105	70	66	1	0	0	0	103.889	151	3.947	4.13	16.52	67.4	43.3	28	114	143	86	3.1	12.2	4.6	277	12.07	8.42	1	5.02	2.37	1.15	2.7	10.3	70	70	0	0	0
1033167	1	45	172	76	25.6896	86	98	105	65	76	0	0	0	0	32.5592	102	3.246	2.26	14.84	56	31.7	24	96	120	77	1.9	2.9	8.3	278	38.23	51	2	2.67	0.78	0.93	1.42	12.8	206	166	0	1	0
1025044	2	44	160	55.5	21.6797	80	86	105	70	78	1	0	0	0	108.905	74	1.582	3.44	14.67	66.8	42.5	15	66	195	396	3.4	5.9	2.6	343	24.6	175.86	3	4.32	1.27	1.32	2.54	8.7	56	64.1	0	0	1
1031840	1	19	180	95	29.321	98	108	100	70	70	0	0	0	0	67.5581	159	2.406	4.54	13.57	66.9	40.2	20	90	112	45	2.9	11.4	1.3	377	21.31	21.21	1	4.82	1.2	1.36	2.7	13.4	131	62.6	0	0	1
1047648	1	60	176	72	23.2438	94	96	100	75	72	1	0	0	0	94.2833	138	1.31	4.61	16.32	60.3	39.5	19	111	147	127	6	3.7	9.1	228	16.5	15.27	1	4.7	1.19	1.34	2.79	9.8	76	71.2	0	0	0
1030328	1	58	172	65	21.9713	82	93	100	70	72	1	0	0	0	103.963	128	0.314	4.3	12.5	64.4	37.9	19	89	166	78	2.7	5.9	1.2	310	5.58	7.21	1	4.42	0.87	1.01	2.71	7.3	62	70.5	0	0	1
1036593	1	70	175	61	19.9184	80	90	100	60	78	0	0	1	0	24.5517	98	2.748	3.28	16.49	85	38.4	24	75	124	22	6	13.9	7.6	480	7.06	7.34	1	4.28	1.11	1.27	2.25	6.5	225	107.3	0	0	1
1011701	2	56	161	62	23.9188	84	93	100	70	86	0	0	0	1	86.4521	153	1.136	2.2	11.05	52.1	27.9	17	76	234	51	5.9	6.4	15.4	198	23.89	51.84	2	2.67	0.7	1.04	1.52	13.2	68	58	0	0	0
1012040	1	46	160	59	23.0469	87	95	90	70	96	0	0	0	0	113.106	123	3.078	4.74	13.91	68.3	41.7	16	67	197	130	6.9	1.6	3.9	212	3.36	59.88	2	3.1	0.9	0.99	1.63	9	62	76.5	0	0	0
